# Supplementary material
Source: MDPI journal article supplement (https://www.mdpi.com/2673-6918/3/1/19)
Supplement: s1 [file s1]

# Optimization of A Solid-Phase Extraction Procedure for the Separation of Picrocrocin and Crocins from Saffron Extract

Panagiota-Kyriaki Revelou <sup>1,2</sup>, Eleni Kougianou <sup>1</sup>, Marinos Xagoraris <sup>1</sup>, Haralambos Evangelaras <sup>3</sup>, George K. Papadopoulos <sup>4</sup>, Charalabos D. Kanakis <sup>1</sup>, Irini F. Strati <sup>2</sup>, Christos S. Pappas <sup>1</sup> and Petros A. Tarantilis <sup>1,\*</sup>

<sup>1</sup> Laboratory of Chemistry, Department of Food Science and Human Nutrition, Agricultural University of Athens EU-CONEXUS European University, 11855 Athens, Greece

<sup>2</sup> Department of Food Science and Technology, University of West Attica, Ag. Spyridonos str, Egaleo, 12243 Athens, Greece

<sup>3</sup> Department of Statistics and Insurance Science, University of Piraeus, 80 Karaoli & Dimitriou st., 18534 Piraeus, Greece

<sup>4</sup> Institute for Design and Analysis of Experiments, University Research Center, Agricultural University of Athens EU-CONEXUS European University, Iera Odos 75, 11855 Athens, Greece

\* Correspondence: ptara@aua.gr; Tel.: +30-2105294262

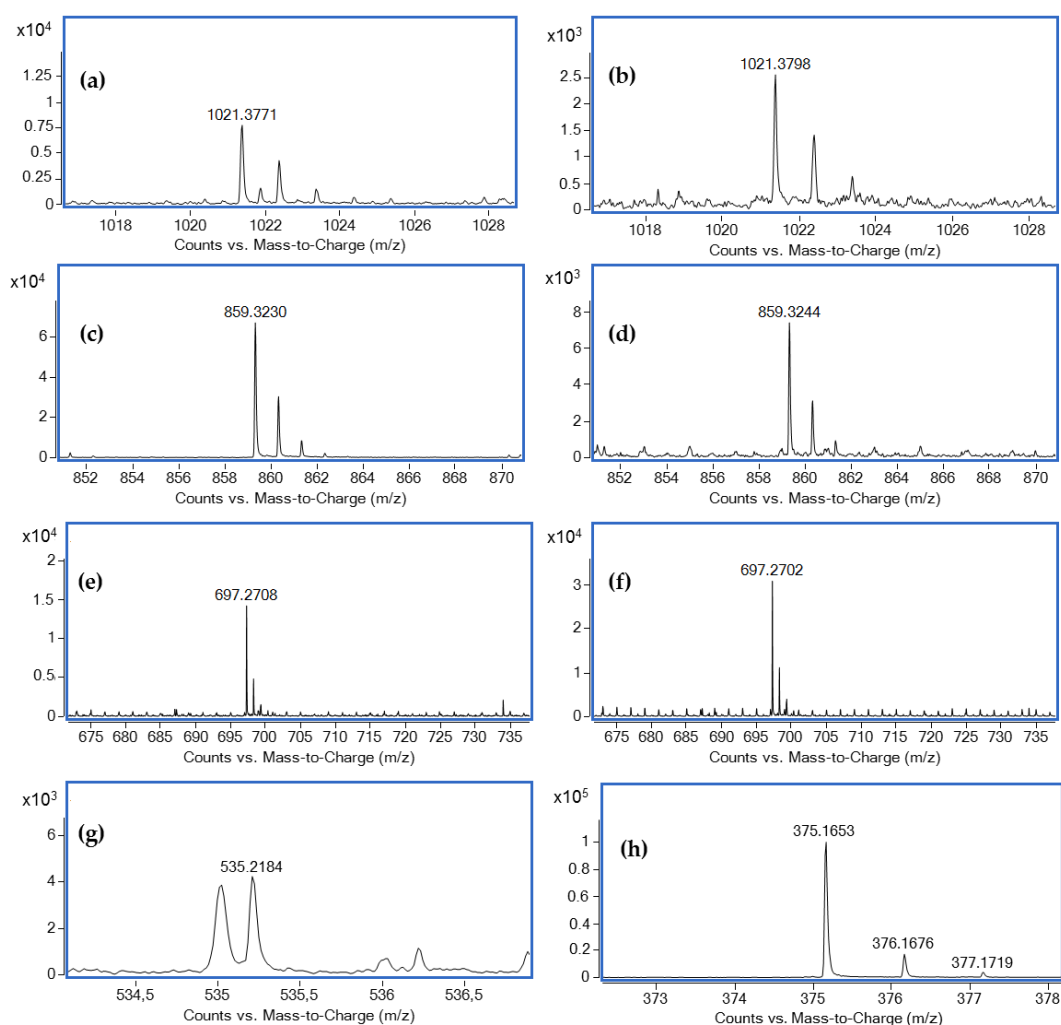

**Figure S1.** Mass spectra of crocins (a) trans 4GG; (b) trans 3Gg; (c) trans 2G; (d) cis 4GG; (e) cis 3Gg; (f) cis 2G; (g) cis 1g; and (h) picrocrocin.

**Table S1.** Rotatable central composite design for the three independent experimental factors (A, B and C) along with the experimental values of the response (absorbance of picocrocin at 257 nm).

| Run | Space Type | Factor 1<br>A: sample volume<br>(mL) | Factor 2<br>B: ACN/H <sub>2</sub> O<br>(% v/v) | Factor 3<br>C: Aqueous ACN vol-<br>ume (mL) | Response<br>Absorbance<br>257 nm |
|-----|------------|--------------------------------------|------------------------------------------------|---------------------------------------------|----------------------------------|
| 1   | Factorial  | 1.000                                | 10.000                                         | 10.000                                      | 0.295                            |
| 2   | Axial      | 0.318                                | 12.500                                         | 20.000                                      | 0.321                            |
| 3   | Axial      | 2.000                                | 8.296                                          | 20.000                                      | 0.344                            |
| 4   | Factorial  | 3.000                                | 15.000                                         | 30.000                                      | 1.314                            |
| 5   | Center     | 2.000                                | 12.500                                         | 20.000                                      | 1.205                            |
| 6   | Factorial  | 1.000                                | 15.000                                         | 30.000                                      | 0.639                            |
| 7   | Axial      | 3.682                                | 12.500                                         | 20.000                                      | 1.851                            |
| 8   | Factorial  | 1.000                                | 10.000                                         | 30.000                                      | 0.442                            |
| 9   | Center     | 2.000                                | 12.500                                         | 20.000                                      | 1.164                            |
| 10  | Factorial  | 1.000                                | 15.000                                         | 10.000                                      | 1.108                            |
| 11  | Factorial  | 3.000                                | 10.000                                         | 10.000                                      | 1.420                            |
| 12  | Factorial  | 3.000                                | 10.000                                         | 30.000                                      | 1.148                            |
| 13  | Axial      | 2.000                                | 12.500                                         | 36.818                                      | 0.752                            |
| 14  | Center     | 2.000                                | 12.500                                         | 20.000                                      | 1.187                            |
| 15  | Center     | 2.000                                | 12.500                                         | 20.000                                      | 1.109                            |
| 16  | Center     | 2.000                                | 12.500                                         | 20.000                                      | 1.184                            |
| 17  | Center     | 2.000                                | 12.500                                         | 20.000                                      | 1.166                            |
| 18  | Factorial  | 3.000                                | 15.000                                         | 10.000                                      | 0.502 <sup>1</sup>               |
| 19  | Axial      | 2.000                                | 12.500                                         | 3.182                                       | 0.897                            |
| 20  | Axial      | 2.000                                | 16.704                                         | 20.000                                      | 1.366                            |

<sup>1</sup> A dilution factor of 10 has been applied.

**Table S2.** Rotatable central composite design for the three independent experimental factors (A, B and C) along with the experimental values of the response (crocins absorbance at 440 nm).

| Run | Space Type | Factor 1<br>A: Saffron extract volume (mL) | Factor 2<br>B: ACN/H <sub>2</sub> O (%v/v) | Factor 3<br>C: Aqueous ACN volume (mL) | Response<br>Absorbance 440 nm |
|-----|------------|--------------------------------------------|--------------------------------------------|----------------------------------------|-------------------------------|
| 1   | Factorial  | 1.000                                      | 25.000                                     | 10.000                                 | 1.707                         |
| 2   | Factorial  | 3.000                                      | 25.000                                     | 10.000                                 | 0.528 <sup>1</sup>            |
| 3   | Center     | 2.000                                      | 37.500                                     | 20.000                                 | 0.270 <sup>1</sup>            |
| 4   | Factorial  | 1.000                                      | 50.000                                     | 10.000                                 | 0.437 <sup>2</sup>            |
| 5   | Factorial  | 3.000                                      | 50.000                                     | 10.000                                 | 0.712 <sup>1</sup>            |
| 6   | Center     | 2.000                                      | 37.500                                     | 20.000                                 | 0.282 <sup>1</sup>            |
| 7   | Center     | 2.000                                      | 37.500                                     | 20.000                                 | 0.274 <sup>1</sup>            |
| 8   | Axial      | 2.000                                      | 37.500                                     | 36.818                                 | 0.339 <sup>2</sup>            |
| 9   | Axial      | 3.682                                      | 37.500                                     | 20.000                                 | 0.436 <sup>1</sup>            |
| 10  | Axial      | 2.000                                      | 58.522                                     | 20.000                                 | 0.277 <sup>1</sup>            |
| 11  | Factorial  | 3.000                                      | 50.000                                     | 30.000                                 | 0.286 <sup>2</sup>            |
| 12  | Axial      | 2.000                                      | 37.500                                     | 3.182                                  | 0.443 <sup>1</sup>            |
| 13  | Axial      | 2.000                                      | 16.478                                     | 20.000                                 | 1.027                         |
| 14  | Factorial  | 3.000                                      | 25.000                                     | 30.000                                 | 0.411 <sup>2</sup>            |
| 15  | Factorial  | 1.000                                      | 50.000                                     | 30.000                                 | 1.480                         |
| 16  | Center     | 2.000                                      | 37.500                                     | 20.000                                 | 0.427 <sup>2</sup>            |
| 17  | Factorial  | 1.000                                      | 25.000                                     | 30.000                                 | 1.264                         |
| 18  | Center     | 2.000                                      | 37.500                                     | 20.000                                 | 0.413 <sup>2</sup>            |
| 19  | Axial      | 0.318                                      | 37.500                                     | 20.000                                 | 0.836                         |
| 20  | Center     | 2.000                                      | 37.500                                     | 20.000                                 | 0.243 <sup>1</sup>            |

<sup>1</sup> A dilution factor of 20 has been applied; <sup>2</sup> A dilution factor of 10 has been applied.

**Table S3.** Analysis of variance results for the experimental design of picrocrocic model.

| Source                        | Sum of Squares | DF <sup>1</sup> | Mean Square | F-value | p-value               |
|-------------------------------|----------------|-----------------|-------------|---------|-----------------------|
| Model                         | 2.4100         | 9               | 0.2680      | 27.83   | < 0.0001 <sup>2</sup> |
| A-Saffron extract volume (mL) | 1.2800         | 1               | 1.2800      | 133.28  | < 0.0001              |
| B- ACN/water (% v/v)          | 0.6707         | 1               | 0.6707      | 69.63   | < 0.0001              |
| C-Aqueous ACN volume (mL)     | 0.0307         | 1               | 0.0307      | 3.19    | 0.1044                |
| AB                            | 0.0596         | 1               | 0.0596      | 6.19    | 0.0321                |
| AC                            | 0.0387         | 1               | 0.0387      | 4.01    | 0.0729                |
| BC                            | 0.1176         | 1               | 0.1176      | 12.21   | 0.0058                |
| A <sup>2</sup>                | 0.1002         | 1               | 0.1002      | 10.40   | 0.0091                |
| B <sup>2</sup>                | 0.1276         | 1               | 0.1276      | 13.24   | 0.0045                |
| C <sup>2</sup>                | 0.0147         | 1               | 0.0147      | 1.53    | 0.2450                |
| Residual                      | 0.0963         | 10              | 0.0096      |         |                       |
| Total                         | 2.5063         | 19              |             |         |                       |

<sup>1</sup> DF: degree of freedom; <sup>2</sup> Significant.

**Table S4.** Analysis of variance results for the experimental design of crocins model.

| Source                    | Sum of Squares | DF <sup>1</sup> | Mean Square | F-value | p-value               |
|---------------------------|----------------|-----------------|-------------|---------|-----------------------|
| Model                     | 13.80          | 9               | 1.53        | 32.63   | < 0.0001 <sup>1</sup> |
| A-Sample volume (mL)      | 6.11           | 1               | 6.11        | 129.99  | < 0.0001              |
| B-% v/v Aqueous ACN       | 1.18           | 1               | 1.18        | 25.17   | 0.0005                |
| C-Aqueous ACN volume (mL) | 4.17           | 1               | 4.17        | 88.67   | < 0.0001              |
| AB                        | 0.0000         | 1               | 0.0000      | 0.0004  | 0.9846                |
| AC                        | 0.2996         | 1               | 0.2996      | 6.38    | 0.0301                |
| BC                        | 0.0906         | 1               | 0.0906      | 1.93    | 0.1951                |
| A <sup>2</sup>            | 0.1883         | 1               | 0.1883      | 4.01    | 0.0732                |
| B <sup>2</sup>            | 0.5922         | 1               | 0.5922      | 12.61   | 0.0053                |
| C <sup>2</sup>            | 0.9825         | 1               | 0.9825      | 20.91   | 0.0010                |
| Residual                  | 0.4698         | 10              | 0.0470      |         |                       |
| Total                     | 14.2698        | 19              |             |         |                       |

<sup>1</sup>DF: degree of freedom; <sup>2</sup>Significant.
